# Supplementary material for: Pd nanoparticles immobilized on carbon nanotubes with a polyaniline coaxial coating for the Heck reaction: coating thickness as the key factor influencing the efficiency and stability of the catalyst
Source: Royal Society of Chemistry journal article supplement (doi:10.1039/c7cy02588b), 2018-01-01
Supplement: c7cy02588b1.pdf [file c7cy02588b1.pdf]

**Pd nanoparticles immobilized on carbon nanotubes with a polyaniline coaxial coating  
for the Heck reaction: coating thickness as the key factor influencing the efficiency and  
stability of the catalyst**

Rui Yu<sup>a,b†</sup>, Rui Liu<sup>a,b†</sup>, Jie Deng<sup>c</sup>, Maofei Ran<sup>d</sup>, Ning Wang<sup>e</sup>, Wei Chu<sup>a</sup>, Zhiwei He<sup>b</sup>, Zheng  
Du<sup>f</sup>, Chengfa Jiang<sup>a,\*</sup>, Wenjing Sun<sup>b,\*</sup>

<sup>a</sup>China-America Cancer Research Institute, Key Laboratory for Medical Molecular Diagnostics of  
Guangdong Province, Guangdong Medical University, Dongguan, Guangdong 523808, China;

<sup>b</sup> Department of Chemical Engineering, Sichuan University, Chengdu 610065, China;

<sup>c</sup>College of pharmacy and biological engineering, Chengdu University, Chengdu 610106,  
China;

<sup>d</sup>College of Chemistry & Environment Protection Engineering, Southwest University for  
Nationalities, Chengdu 610041, China

<sup>e</sup>Physical Sciences and Engineering Division, Advanced Membranes and Porous Materials  
Center, King Abdullah University of Science and Technology, Thuwal, 23955-6900, Saudi  
Arabia;

<sup>f</sup>National Supercomputing Center in Shenzhen (Shenzhen Cloud Computing Center),  
Guangdong, Shenzhen, 518055, China

<sup>†</sup>These authors contributed equally to this work.

\*Corresponding author: jiangcf@scu.edu.cn (C. Jiang); swj\_gdmc@163.com (W. Sun)

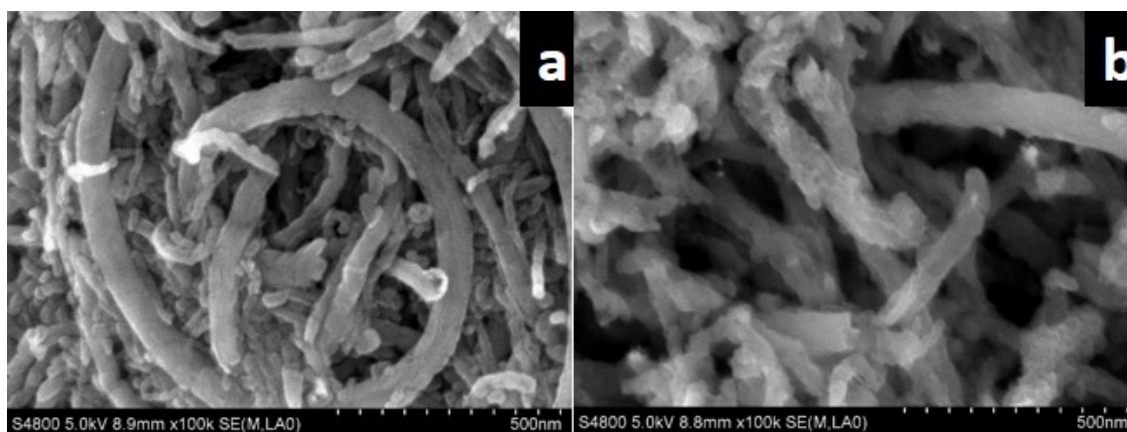

**Fig. S1** SEM results of (a) CNT and CNT@PANI-0.5(b).

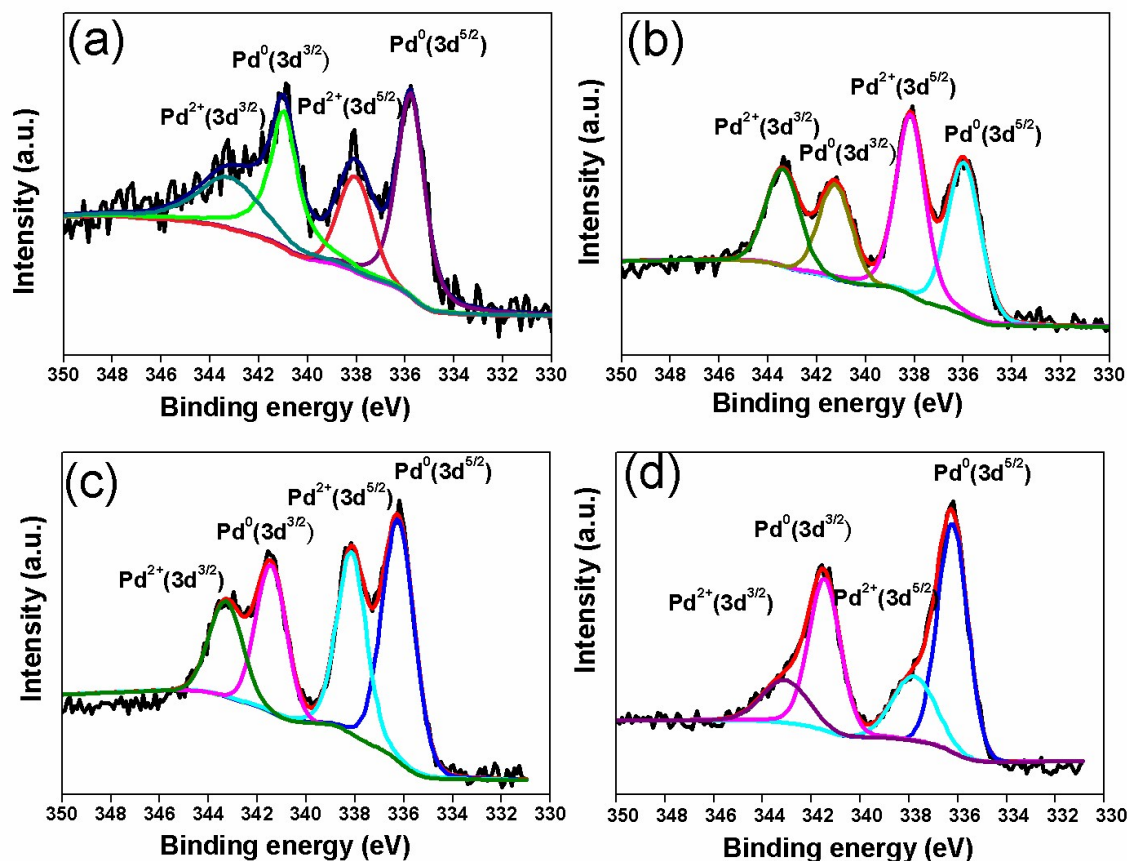

**Fig. S2** Pd 3d core level of XPS spectra of the four catalysts. Pd/CNT(a); Pd/PANI@CNT-0.5(b); Pd/PANI@CNT-1(c); and Pd/PANI@CNT-4(d). The data point of the Pd 3d peaks are fitted by four profiles. The fitting results are shown in Table S1.

**Table S1** Assignment and atomic% of the four catalysts

| Catalysts       | Pd 3d <sup>5/2</sup> |     |                  |     | Pd 3d <sup>3/2</sup> |      |                  |     |
|-----------------|----------------------|-----|------------------|-----|----------------------|------|------------------|-----|
|                 | Pd <sup>0</sup>      |     | Pd <sup>2+</sup> |     | Pd <sup>0</sup>      |      | Pd <sup>2+</sup> |     |
|                 | BE/eV                | at% | BE/eV            | at% | BE/eV                | at%  | BE/eV            | at% |
| Pd/CNT          | 335.8                | 68% | 338.08           | 32% | 341                  | 58 % | 343.2            | 42% |
| Pd/PANI@CNT-0.5 | 336                  | 48% | 338.2            | 52% | 341.3                | 48%  | 343.4            | 52% |
| Pd/PANI@CNT-1   | 336.2                | 58% | 338.2            | 42% | 341.4                | 58%  | 343.3            | 42% |
| Pd/PANI@CNT-4   | 336.2                | 71% | 337.8            | 29% | 341.5                | 72%  | 343.1            | 28% |

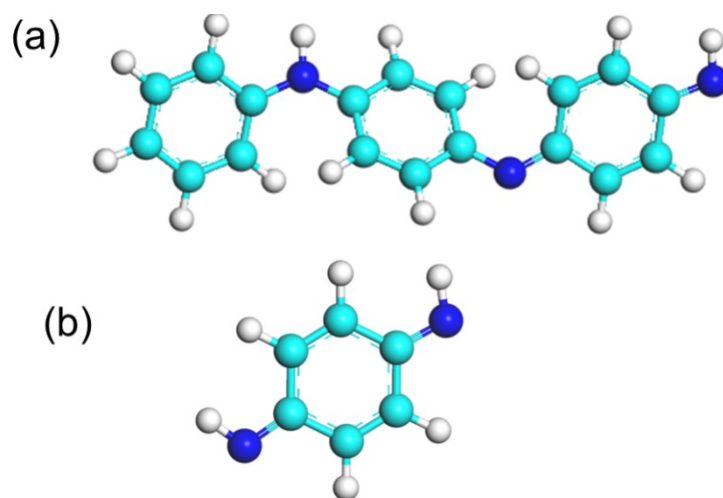**Fig. S3** Molecular structure of PANI unit(a); selected fragment of PANI in this work(b).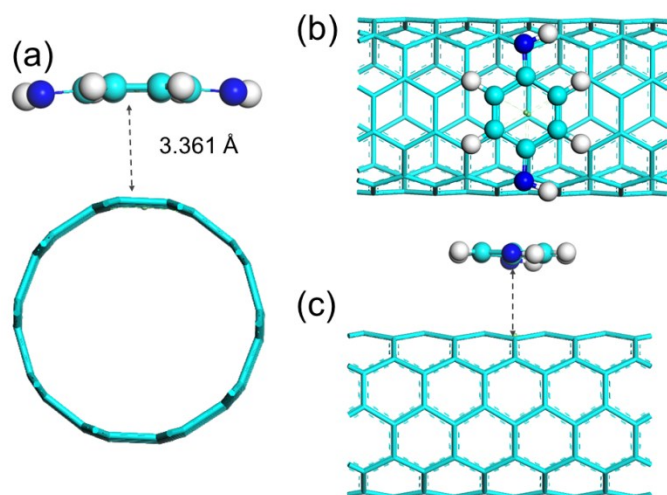**Fig. S4** Optimized structure of PANI@CNT: (a)side view (along the tube); (b)front view; (c)side view

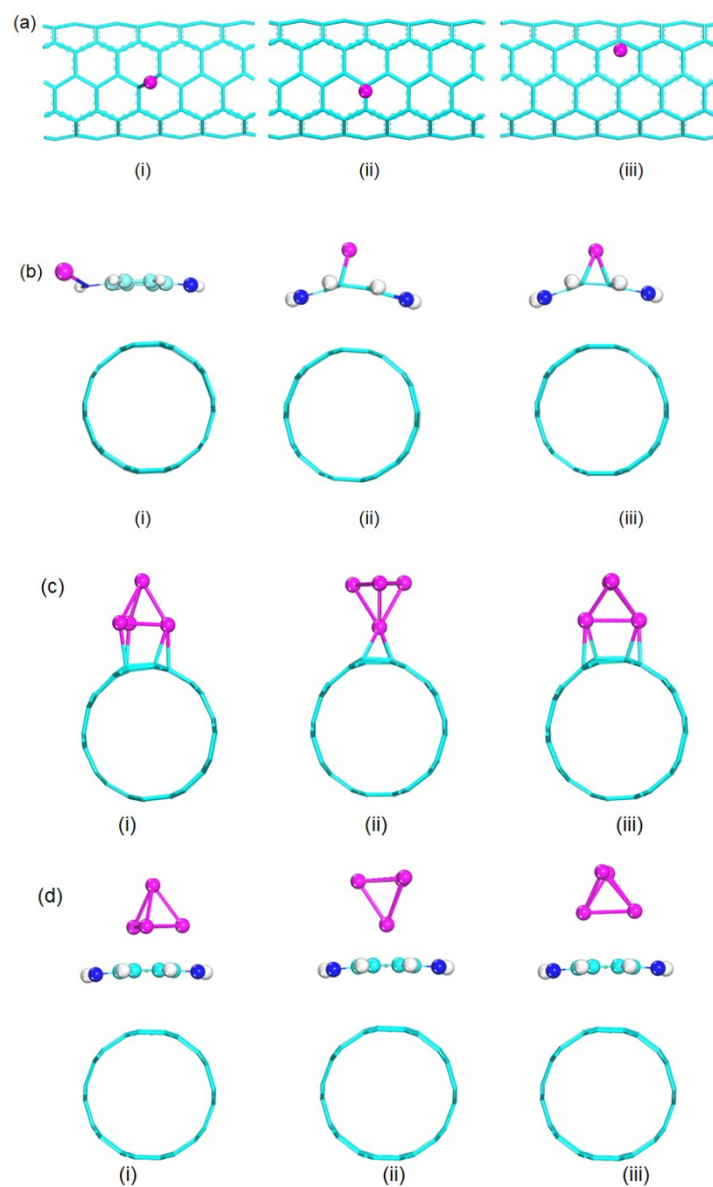

**Fig. S5** Adsorption sites of Pd on CNT(a); Adsorption sites of Pd on PANI@CNT(b); adsorption sites of Pd<sub>4</sub> on CNT(c); adsorption sites of Pd<sub>4</sub> on PANI@CNT(d).

**Table S2** Catalytic performance of catalytic performance of different Pd based catalysts in the coupling reaction

| Entry | Catalyst <sup>1</sup>                                   | Temp (°C) | Time (h) | Amount (mol% Pd) | Yield <sup>2</sup> (%) | Reuse             | Final Yield (%) |
|-------|---------------------------------------------------------|-----------|----------|------------------|------------------------|-------------------|-----------------|
| 1     | Pd/HCN <sup>3</sup> [1]                                 | 120       | 1        | 0.255            | 100 <sup>4</sup>       | 6 <sup>th</sup>   | 100             |
| 2     | Pd/MFC <sup>5</sup> [2]                                 | 120       | 4        | 0.308            | 100 <sup>4</sup>       | 5 <sup>th</sup>   | 95              |
| 3     | Pd/graphene oxide [3]                                   | Reflux    | 5        | 0.54             | 62 <sup>6</sup>        | /                 | /               |
| 4     | Pd/MCPPy <sup>7</sup> [4]                               | 120       | 3        | 0.01 g, 21 wt%   | 97 <sup>6</sup>        | 5 <sup>th</sup>   | /               |
| 5     | PdNs-PAMAM-g-MWCNTs [5]                                 | 100       | 2.5      | 0.3              | 95 <sup>8</sup>        | 7 <sup>th9</sup>  | 95              |
| 6     | Fe <sub>3</sub> O <sub>4</sub> -NH <sub>2</sub> -Pd [6] | 130       | 10       | 5                | >99 <sup>4,10</sup>    | 4 <sup>th</sup>   | 94              |
| 7     | [Pd]-APTS-Y <sup>11</sup> [7]                           | 120       | 2        | 0.075 g, 4.5 wt% | 95 <sup>4,10</sup>     | 3 <sup>rd9</sup>  | 94              |
| 8     | PVP-Pd/SiO <sub>2</sub> [8]                             | 120       | 1        | 0.5              | 93 <sup>8</sup>        | 7 <sup>th12</sup> | 100             |
| 9     | Pd/N-MCNPs <sup>13</sup> [9]                            | 120       | 3        | 0.01g, 40 wt%    | 97 <sup>8,10</sup>     | 3 <sup>rd</sup>   | 97              |
| 10    | PANI-Pd [10]                                            | 120       | 40       | 2.25             | 98 <sup>8</sup>        | 3 <sup>rd</sup>   | 90              |
| 11    | Pd/PANI@CNT-0.5 <sup>14</sup>                           | 110       | 1.5      | 0.15             | 98 <sup>4</sup>        | 10 <sup>th</sup>  | 94              |
| 12    | Pd/PANI@CNT-0.5 <sup>14</sup>                           | 100       | 2.5      | 0.2              | 95 <sup>4</sup>        | /                 | /               |

<sup>1</sup>References; <sup>2</sup>Coupling reaction of iodobenzene and styrene; <sup>3</sup>HCN=hollow carbon nanonets; <sup>4</sup>Yields were calculated against the consumption of the aryl halides; <sup>5</sup>Pd/MFC=Pd nanoparticles supported on magnetic Fe<sub>3</sub>O<sub>4</sub>@C nanocomposites; <sup>6</sup>GC Yield; <sup>7</sup>MCPPy= magnetic carboxylated polypyrrole nanotubes; <sup>8</sup>Isolated yields; <sup>9</sup>Reaction of 4-methyl-iodobenzene and methyl acrylate; <sup>10</sup>N<sub>2</sub> atmosphere; <sup>11</sup>APTS-Y=Amine-Functionalized Zeolite; <sup>12</sup>Reaction of iodobenzene and n-butyl acrylate; <sup>13</sup>N-MCNPs=Nitrogen-doped magnetic carbon nanoparticles; <sup>14</sup>Reaction conditions: iodobenzene (1 mmol), styrene (1.5 mmol), NEt<sub>3</sub> (1.5 mmol) and 2 mL of DMF.

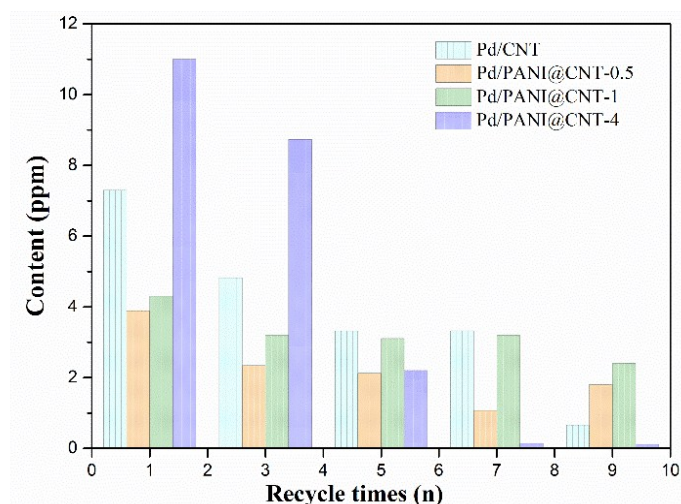

**Fig. S6.** Leached amounts of the Pd species in solvent in selected runs. Reaction conditions: The reaction was carried out with 5 mmol of IB, 7.5 mmol of styrene, 7.5 mmol of  $\text{NEt}_3$ , 0.15 mol% Pd with respect to the IB and 10 mL of DMF at 110 °C. The tested details are presented in experimental section.

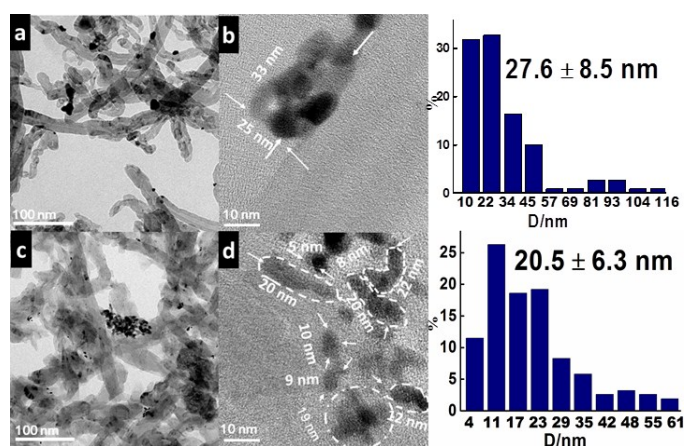

**Fig. S7.** TEM of catalyst after recycling ten times: Pd/CNT(a,b); Pd/PANI@CNT-0.5(c,d). The used catalyst was washed with DMF, ethyl alcohol and water to remove organic compounds like stilbene.



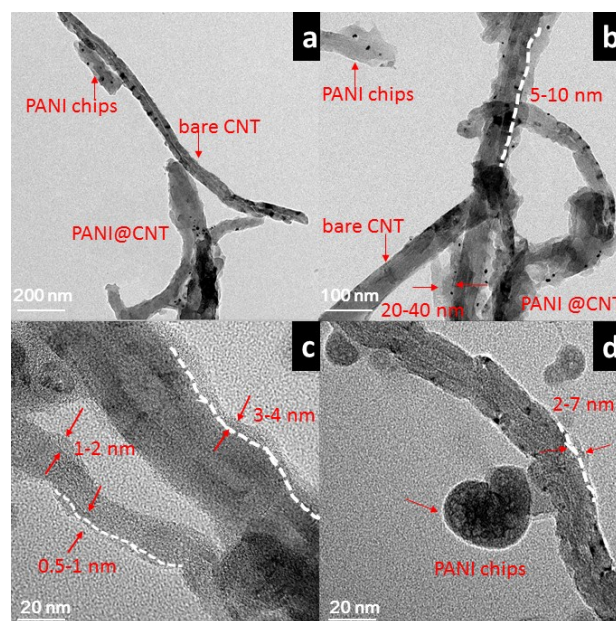

**Fig. S8** TEM results of Pd/CNT@PANI-4 after five times of reuse.

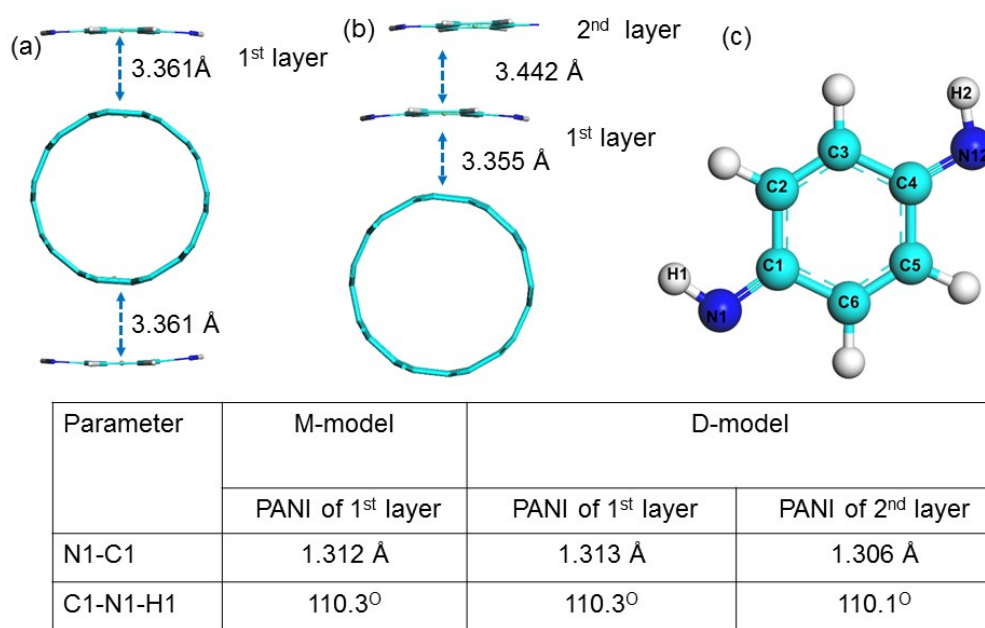

**Fig. S9** Structural parameters of PANI2@CNT with M-model(a); D-model(b) and atom name of PANI fragment(c).

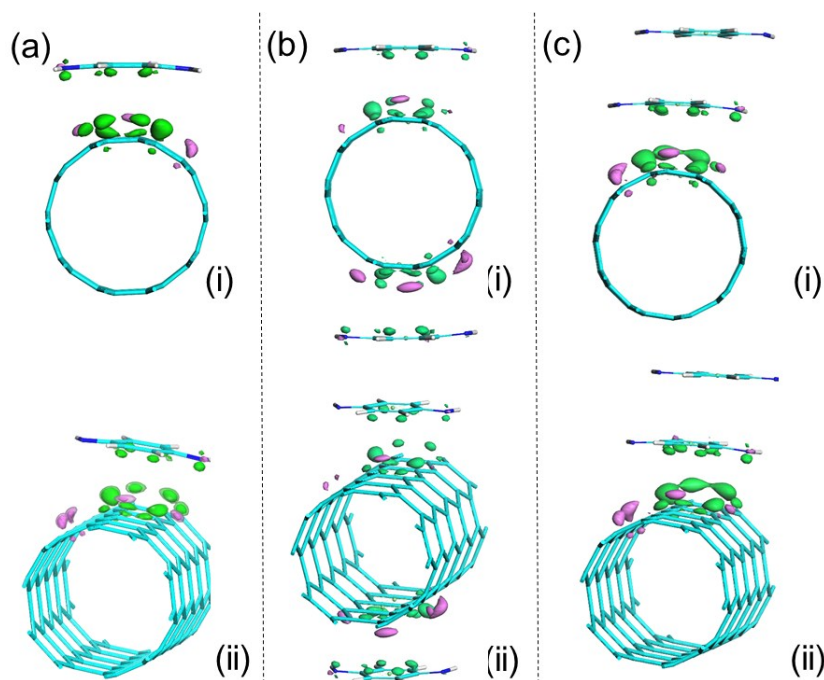

**Fig. S10** Calculated charge density difference  $\Delta\rho$  for PANI@CNT complex(a); PANI2@CNT with M-model(b); PANI2@CNT with D-model(c); front view(i); side view(ii). Iso-density surfaces for electron accumulation/depletion of  $0.002 \text{ e}/\text{\AA}^3$  are displayed in green (-)/pink (+).

## References

- [1] M. Zhu, Y. Wang, C. Wang, W. Li, G. Diao, *Catal. Sci. Technol.* 2013, **3**, 952.
- [2] M. Zhu, G. Diao, *J Phys. Chem. C* 2011, **115** (50), 24743.
- [3] Y. V. Ioni, S. E. Lyubimov, V. A. Davankov, S. P. Gubin, *Russ. J. Inorg. Chem.* 2013, **58**, 392.
- [4] S. Ko, J. Jang, *Angew. Chem. Int. Ed.* 2006, **45**, 7564.
- [5] M. R. Nabid, Y. Bide, S. J. Tabatabaei Rezaei, *Appl. Catal. A-Gen.* 2011, **406**, 124.
- [6] F. Zhang, J. Jin, X. Zhong, S. Li, J. Niu, R. Li, J. Ma, *Green Chem.* 2011, **13** (5), 1238.
- [7] S. Mandal, D. Roy, R. V. Chaudhari, M. Sastry, *Chem. Mater.* 2004, **16** (19), 3714.
- [8] B. Tamami, H. Allahyari, S. Ghasemi, F. Farjadian, *J. Organomet. Chem.* 2011, **696** (2), 594.
- [9] H. Yoon, S. Ko, J. Jang, *Chem. Commun.* 2007, **14**, 1468.
- [10] H. A. Patel, A. L. Patel, A. V. Bedekar, *Appl. Org. Chem.* 2014, **29**, 1.
